# Supplementary material
Source: PubMed Central journal article supplement (PMC3345046)

FIGURE S1.

A

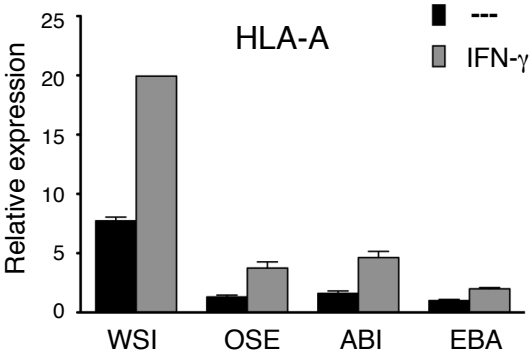

B

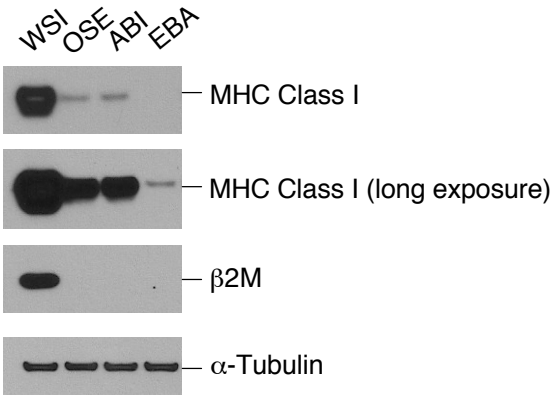

WSI: WT  
OSE: RFX5 (-/-)  
ABI: RFXAP (-/-)  
EBA: RFXANK/B (-/-)

Supplement: NIHMS363553-supplement-2.pdf [file NIHMS363553-supplement-2.pdf]
